# Supplementary material
Source: PubMed Central journal article supplement (PMC8042655)
Supplement: NIHMS1679066-supplement-MMC1.pdf [file NIHMS1679066-supplement-MMC1.pdf]

**Supplementary Table 1.** MIND diet Screening instrument and scoring

| <b>Diet Questionnaire</b>                                                                                                                                                                               | <b>Frequency</b>          |
|---------------------------------------------------------------------------------------------------------------------------------------------------------------------------------------------------------|---------------------------|
| 1. How many times per week do you consume food from a fast food restaurant such as McDonalds, Burger King, Denny’s, Dominos, Popeye’s, or Kentucky Fried Chicken?                                       | __ __ <i>per week</i>     |
| 2. How often do you consume sweets, candy bars, pastries, cookies, or cakes per week?                                                                                                                   | __ __ <i>per week</i>     |
| 3. How many servings of butter or stick margarine do you consume each day? (1 pat or teaspoon(tsp))                                                                                                     | __ __ <i>tsp per day</i>  |
| 4. How many servings of whole fat or regular cheese or cream cheese do you eat each week? (1oz)                                                                                                         | __ __ <i>per week</i>     |
| 5. How many servings of red meat or processed meat, such as steak, ham, roast, hamburger, hot dogs or sausages do you consume each week? (3-5 oz)                                                       | __ __ <i>per week</i>     |
| 6. How many servings of fish (not fried) do you consume each week? (3-5oz)                                                                                                                              | __ __ <i>per week</i>     |
| 7. How many servings of poultry, such as chicken or turkey (not fried, skinless) do you consume each week? (3-5 oz)                                                                                     | __ __ <i>per week</i>     |
| 8. How many tablespoons (Tpsb) of olive oil do you consume per day (including that used in salad dressings and cooking, sautéing, or on bread)?                                                         | __ __ <i>Tbsp per day</i> |
| 9. How many servings of green leafy vegetables do you eat each week, such as spinach, kale, greens, or romaine? (1 cup leafy; ½ cup cooked/raw chopped)                                                 | __ __ <i>per week</i>     |
| 10. How many servings of other types of vegetables do you eat each week (e.g. broccoli, carrots, peas, onions, green/red peppers, celery, string beans, tomatoes, yams, squash, eggplant, etc.)?(½ cup) | __ __ <i>per week</i>     |
| 11. How many servings (1/2c) of berries do you eat each week (e.g. strawberries, blueberries, raspberries)?(½ cup)                                                                                      | __ __ <i>per week</i>     |
| 12. How many servings of beans/legumes do you consume each week?(½ cup)                                                                                                                                 | __ __ <i>per week</i>     |
| 13. How many servings of whole grain breads, pasta, or cereals do you eat each day? (1 slice dark bread; ½ cup brown rice or pasta; ¾ cup whole grain cereal)                                           | __ __ <i>per day</i>      |
| 14. How many servings of nuts do you eat each week? (handful or ¼ cup)                                                                                                                                  | __ __ <i>per week</i>     |

**Supplementary Table 2. MIND Diet Components and Scoring**

| Food                                       | Score            |                    |                  |
|--------------------------------------------|------------------|--------------------|------------------|
|                                            | 0.0              | 0.5                | 1.0              |
| Fast and fried foods <sup>1</sup>          | ≥ 4 meal/wk      | > 1 - < 4/wk       | < 1 meal/wk      |
| Pastries and sweets <sup>2</sup>           | ≥ 7 servings/wk  | ≥ 5 - < 7 wk       | < 5 servings/wk  |
| Butter and stick margarine                 | ≥ 14 pat(tsp)/wk | > 7 - < 14/wk      | ≤ 7 pat(tsp)/wk  |
| Regular cheese                             | ≥ 7 servings/wk  | > 2 - < 7/wk       | ≤ 2 serving/wk   |
| Red and processed meats <sup>3</sup>       | ≥ 7 meals/wk     | ≥ 4 - < 7/wk       | < 4 meals/wk     |
| Fish (not fried) <sup>4</sup>              | < 1/wk           | 1/wk               | > 1 meal/wk      |
| Poultry (not fried, skinless) <sup>5</sup> | < 1 meal/wk      | ≥ 1 - < 2/wk       | ≥ 2 meals/wk     |
| Olive oil                                  | < 1 Tbsp/d       | ≥ 7 - < 14 Tbsp/wk | ≥ 14 Tbsp/wk     |
| Green leafy vegetables <sup>6</sup>        | ≤ 2 servings/wk  | > 2 to < 7/wk      | ≥ 7 servings/wk  |
| Other vegetables <sup>7</sup>              | < 5 servings/wk  | ≥ 5 - < 7/wk       | ≥ 7 servings/wk  |
| Berries <sup>8</sup>                       | < 1 serving/wk   | ≥ 1 - < 5/wk       | ≥ 5 servings/wk  |
| Beans and legumes <sup>9</sup>             | < 1 serving/wk   | ≥ 1 - < 3/wk       | > 3 meals/wk     |
| Whole grains                               | < 7 serving/wk   | ≥ 7 - < 21/wk      | ≥ 21 servings/wk |
| Nuts                                       | < 1 serving/wk   | ≥ 1 - < 5/wk       | ≥ 5 servings/wk  |
| <b>TOTAL SCORE</b>                         | <b>0</b>         | <b>7</b>           | <b>14</b>        |

<sup>1</sup> How often do you eat fast food or fried food away from home (e.g., french fries)?

<sup>2</sup> Biscuits/rolls, toaster pastries, cake, snack cakes, Danish/sweet rolls/pastries, donuts, cookies, brownies, pie, candy bars, other candy, ice cream, pudding, milkshakes/frappes

<sup>3</sup> Cheeseburgers/hamburgers; beef tacos/burritos; hot dogs/sausages; roast beef, ham, salami, bologna, or other deli meat sandwiches; beef (steak, roast) or lamb as main dish; pork or ham as main dish; meatballs or meatloaf

<sup>4</sup> Tuna sandwich, fresh fish as main dish, not fried

<sup>5</sup> Chicken or turkey sandwiches, chicken or turkey as main dish

<sup>6</sup> Kale, collards, greens, spinach, lettuce/tossed salad

<sup>7</sup> Green/red peppers, squash, cooked carrots, raw carrots, broccoli, celery, potatoes, peas or lima beans, potatoes, tomatoes, tomato sauce, string beans, beets, corn, zucchini/summer squash, eggplant, coleslaw, potato salad

<sup>8</sup> Strawberries, blueberries, raspberries, blackberries

<sup>9</sup> Beans, lentils, soybeans
